# Supplementary material
Source: Springer Nature journal article supplement (https://www.springermedizin.de/resource/supplementary/12939_2013_460_MOESM2_ESM.pdf/9551214)

Odds Ratio and 95% C

1.2  
0.8  
0.4  
0.0

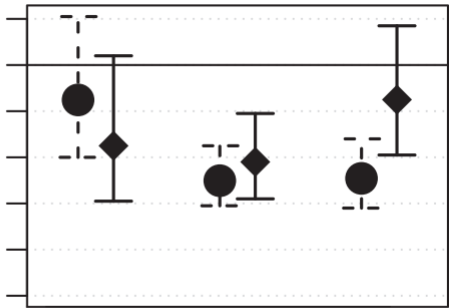

St. Petersburg

Estonia

Finland

Supplement: MOESM2 [file 9551214]
